# Supplementary material for: Direct synthesis of tricyclic 5H-pyrido[3,2,1-ij]quinolin-3-one by domino palladium catalyzed reaction
Source: Royal Society of Chemistry journal article supplement (doi:10.1039/b611020g), 2006-01-01
Supplement: b611020g.pdf [file b611020g.pdf]

## Supplementary materials

### 8-quinolinyl trifluoromethanesulfonate **1b**

To a pyridine solution of 8-hydroxyquinoline (0.29g, 2mmol) trifluoromethanesulfonic anhydride (2.4 mmol) was added dropwise at 0°C. The solution was stirred at 0°C for 5 min and warmed to 25°C with stirring for 24h. The resulting mixture was poured into cold water and extracted with ethyl acetate. The organic layer was then washed sequentially with 1N aqueous hydrochloric acid solution, and water, dried over MgSO<sub>4</sub>, and concentrated to yield **1b** (0.5g, 92%) as an orange solid which was used without purification. NMR data according to Li and al.<sup>12</sup>

### 8-quinolinyl methanesulfonate **1c**

To a dichloromethane solution of 8-hydroxyquinoline (0.29g, 2mmol) triéthylamine (3 mmol) and methanesulfonic chloride (2.4 mmol) were added at 0°C. The solution was stirring at 0°C for 5 min and warmed to 25°C with stirring for 3h. The resulting mixture was poured into water and extracted with dichloromethane. The dichloromethane extract was then washed with water, dried over MgSO<sub>4</sub> and concentrated to give **1c** (0.38g, 85 %) as brown oil which was used without purification.

### Palladium catalyzed coupling reaction with Cacchi's conditions.

2.4 mmol of bromoquinoline, 7.2 mmol of acrolein (or diethyl acetal acrolein), 3.6 mmol of K<sub>2</sub>CO<sub>3</sub>, 2.4 mmol of n-Bu<sub>4</sub>NOAc, 2.4 mmol of KCl and 5mol% of Pd(OAc)<sub>2</sub> were introduced in a pressure tube under argon. 10 mL of DMF previously deaerated was added and the mixture was deaerated by an argon flow for 5 min. The reactor was then placed in a pre-heated oil bath at 90°C for 24 h under vigorous stirring and then cooled to room temperature before the reaction mixture was analyzed by GC.

### 3-Quinolin-8-yl-propenal **2**

At completion of the reaction, the mixture was diluted with water (150 mL) and the resulting mixture was extracted with CH<sub>2</sub>Cl<sub>2</sub> (4 x 20 mL). The combined organic layers were washed

three times with H<sub>2</sub>O (acrolein) or HCl 0.1N (diethylacetal acrolein), then brine (15 mL), dried over MgSO<sub>4</sub> and evaporated. The residue was then purified by flash chromatography on silica gel. Orange solid. mp 125°C.  $\nu_{\max}(\text{KBr})/\text{cm}^{-1}$  1663 and 1118;  $\delta_{\text{H}}$  (250 MHz; CDCl<sub>3</sub>) 6.90 (1 H, dd, *J* 7.9 and 16.2, HC=CH-CHO), 7.42 (1 H, dd, *J* 8.3 and 4.2, C(3)H); 7.52 (1 H, t, *J* 7.7, C(6)H); 7.85 (1 H, d, *J* 8.2, C(5)H); 7.97 (1 H, d, *J* 7.3, C(7)H); 8.13 (1 H, d, *J* 8.3, C(4)H); 8.83 (1 H, d, *J* 16.2, HC=CH-CHO); 8.90 (1 H, d, *J* 4.2, C(2)H) and 9.79 (1 H, d, *J* 7.9 CHO);  $\delta_{\text{C}}$  (62.9 MHz; CDCl<sub>3</sub>) 194.32 (CHO); 150.25 (CH=CH-CHO); 148.64 (C<sup>2</sup>-C<sub>9</sub>H<sub>7</sub>N); 145.58 (C<sup>10</sup>-C<sub>9</sub>H<sub>6</sub>N); 136.31 (C<sup>4</sup>-C<sub>9</sub>H<sub>6</sub>N); 132.08 (C<sup>8</sup>-C<sub>9</sub>H<sub>6</sub>N); 130.85 (CH=CH-CHO); 129.85 (C<sup>5</sup>-C<sub>9</sub>H<sub>6</sub>N); 128.30 (C<sup>9</sup>-C<sub>9</sub>H<sub>6</sub>N); 127.79 (C<sup>7</sup>-C<sub>9</sub>H<sub>6</sub>N); 126.15 (C<sup>6</sup>-C<sub>9</sub>H<sub>6</sub>N); 121.66 (C<sup>3</sup>-C<sub>9</sub>H<sub>6</sub>N); m/z (CI) 184.0765 (M + H<sup>+</sup> C<sub>12</sub>H<sub>10</sub>NO requires 184.0762) 184 (MH<sup>+</sup>, 100%), 85 (17)

### **Palladium catalyzed coupling reaction with palladacycle catalyst.**

2.4 mmol of bromoquinoline, 7.2 mmol of acrolein (or diethyl acetal acrolein), 3.6 mmol of NaOAc and 1mol% of Hermann's palladacycle were introduced in a pressure tube under argon. 8 mL of NMP previously deaerated was added and the mixture was deaerated by an argon flow for 5 min. The reactor was then placed in a pre-heated oil bath at 140°C for 24 h under vigorous stirring and then cooled to room temperature before the reaction mixture was analyzed by GC.

### **5*H*-Pyrido[3,2,1-*ij*]quinolin-3-one 3**

At completion of the reaction, the mixture was diluted with water (150 mL) and the resulting mixture was extracted with CH<sub>2</sub>Cl<sub>2</sub> (4 x 20 mL). The combined organic layers were washed three times with H<sub>2</sub>O, then brine, dried over MgSO<sub>4</sub> and evaporated. The residue was then purified by flash chromatography on silica gel. The structure of the 5*H*-pyrido[3,2,1-*ij*]quinolin-3-one **3** was assigned according to NMR data and GC/MS analysis: yellow solid. m.p: 127 °C.  $\nu_{\max}(\text{KBr})/\text{cm}^{-1}$  1640, 1576, 1132;  $\delta_{\text{H}}$  (250 MHz; CDCl<sub>3</sub>) 4.78 (2 H, m, CH<sub>2</sub>N). 5.94 (1 H, dt, *J* 10.2 and 3.6, C(3)H); 6.43 (1 H, dt, *J* 10.2 and 2.2, C(4)H); 6.62 (1 H, d, *J* 9.5, HC=CH-CO); 6.98-7.26 (3H, m, C(5)H, C(6)H, C(7)H); 7.57 (1H, d, *J* 9.5, HC=CH-CO);  $\delta_{\text{C}}$  (62.9 MHz; CDCl<sub>3</sub>) 161.71 (CON); 138.80 (HC=CH-CON); 131.89(C<sup>10</sup>-C<sub>9</sub>H<sub>7</sub>N); 127.28 (C<sup>9</sup>-C<sub>9</sub>H<sub>7</sub>N); 126.99 (C<sup>8</sup>-C<sub>9</sub>H<sub>7</sub>N); 125.56 (C<sup>7</sup>-C<sub>9</sub>H<sub>7</sub>N); 125.35 (C<sup>5</sup>-C<sub>9</sub>H<sub>7</sub>N); 123.96 (C<sup>6</sup>-C<sub>9</sub>H<sub>7</sub>N); 123.14 (C<sup>3</sup>-C<sub>9</sub>H<sub>7</sub>N); 122.33 (C<sup>4</sup>-C<sub>9</sub>H<sub>7</sub>N); 121.18 (HC=CH-CON); 45.44 (C<sup>2</sup>-C<sub>9</sub>H<sub>7</sub>N); m/z (CI) 184.0762 (M + H<sup>+</sup> C<sub>12</sub>H<sub>10</sub>NO requires 184.0762) 184 (MH<sup>+</sup>, 100%), 170 (9), 114 (21).

### 3-Quinolin-8-yl-propionic acid ethyl ester 5

Using same work-up as for **3** except that the combined organic layers were washed three times with HCl 0.2 N. Yellow solid. m.p.: 133 °C.  $\nu_{\max}(\text{KBr})/\text{cm}^{-1}$  1728, 1168;  $\delta_{\text{H}}$  (250 MHz;  $\text{CDCl}_3$ ) 1.04 (3 H, t,  $J$  7.2,  $\text{COOCH}_2\text{CH}_3$ ); 2.71 (2 H, t,  $J$  7.7,  $\text{CH}_2\text{CH}_2\text{CO}_2$ ); 3.44 (2 H, t,  $J$  7.7,  $\text{CH}_2\text{CH}_2\text{CO}_2$ ); 3.96 (2 H, q,  $J$  7.2,  $\text{COOCH}_2\text{CH}_3$ ); 7.67- 8.07 (8 H, m, aromatics);  $^{13}\text{C}$  NMR: 173.23 ( $\text{CO}_2\text{Et}$ ); 151.04 ( $\text{C}^2\text{-C}_9\text{H}_6\text{N}$ ); 149.20 ( $\text{C}^{10}\text{-C}_9\text{H}_6\text{N}$ ); 136.44 ( $\text{C}^4\text{-C}_9\text{H}_6\text{N}$ ); 136.15 ( $\text{C}^8\text{-C}_9\text{H}_6\text{N}$ ); 132.98 ( $\text{C}^7\text{-C}_9\text{H}_6\text{N}$ ); 129.34 ( $\text{C}^9\text{-C}_9\text{H}_6\text{N}$ ); 127.69 ( $\text{C}^6\text{-C}_9\text{H}_6\text{N}$ ); 126.81 ( $\text{C}^5\text{-C}_9\text{H}_6\text{N}$ ); 121.76 ( $\text{C}^3\text{-C}_9\text{H}_6\text{N}$ ); 60.12 ( $\text{COOCH}_2\text{CH}_3$ ); 35.07 ( $\text{CH}_2\text{COOC}_2\text{H}_5$ ); 27.29 ( $\text{CH}_2\text{CH}_2$ ); 14.17 ( $\text{CH}_2\text{CH}_3$ ).  $m/z$  (CI) 230.1182 ( $\text{M} + \text{H}^+$   $\text{C}_{14}\text{H}_{15}\text{NO}_2$  requires 230.1181) 230 ( $\text{MH}^+$ , 100%), 184 (73), 79 (12).
